# Supplementary material for: Synthesis, properties and water permeability of SWNT buckypapers
Source: Royal Society of Chemistry journal article supplement (doi:10.1039/c2jm31382k), 2012-01-01
Supplement: c2jm31382k.pdf [file c2jm31382k.pdf]

# Synthesis, properties and water permeability of SWNT buckypaper membranes

L. J. Sweetman, L. Nghiem, I. Chironi, G. Triani, M. in het Panhuis and S. F. Ralph

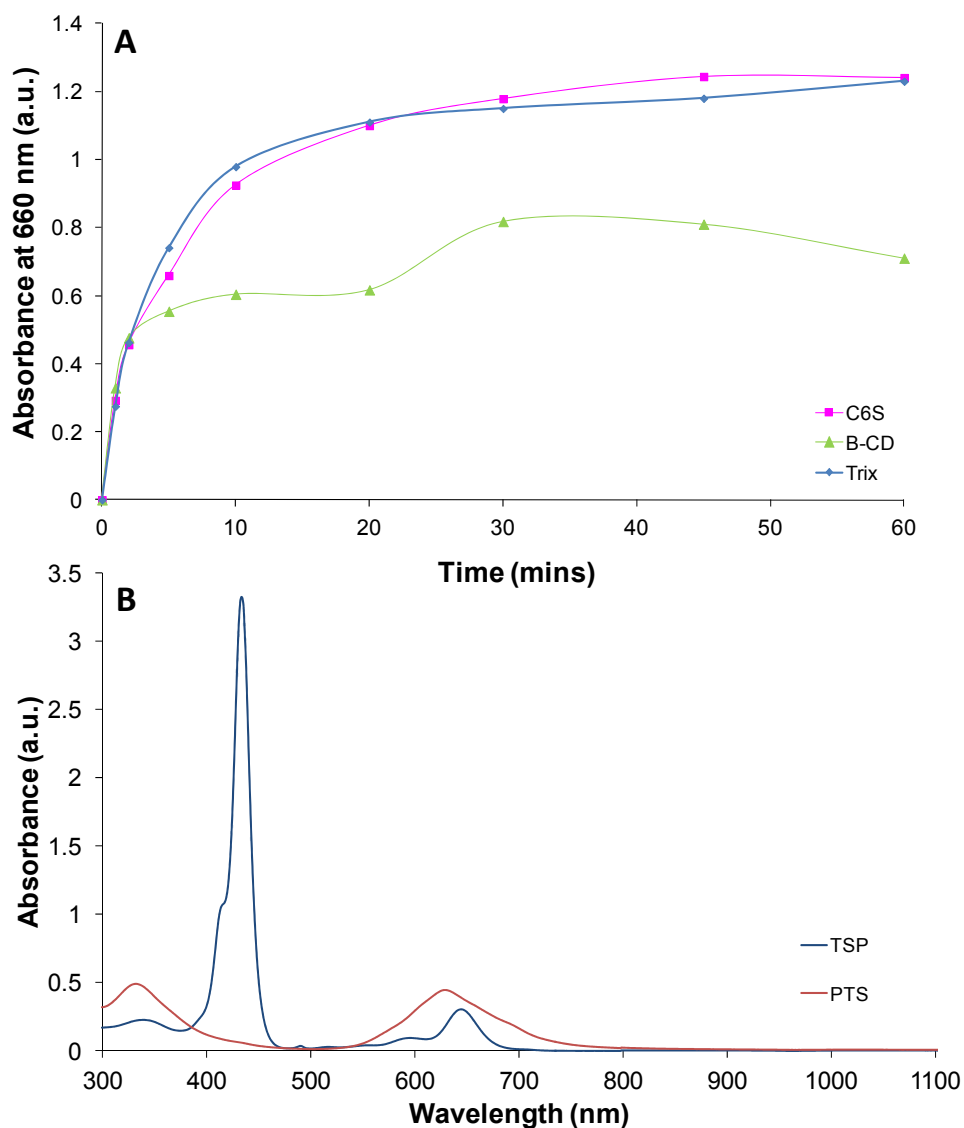

**Figure S1:** (a) The effect of increasing sonication time on the absorbance at 660 nm of SWNT dispersions containing different dispersants that do not have spectral interference in this region and (b) UV-vis-NIR spectra of aqueous solutions of PTS and TSP at the same concentration used to prepare SWNT dispersions showing spectral interference at 660 nm.

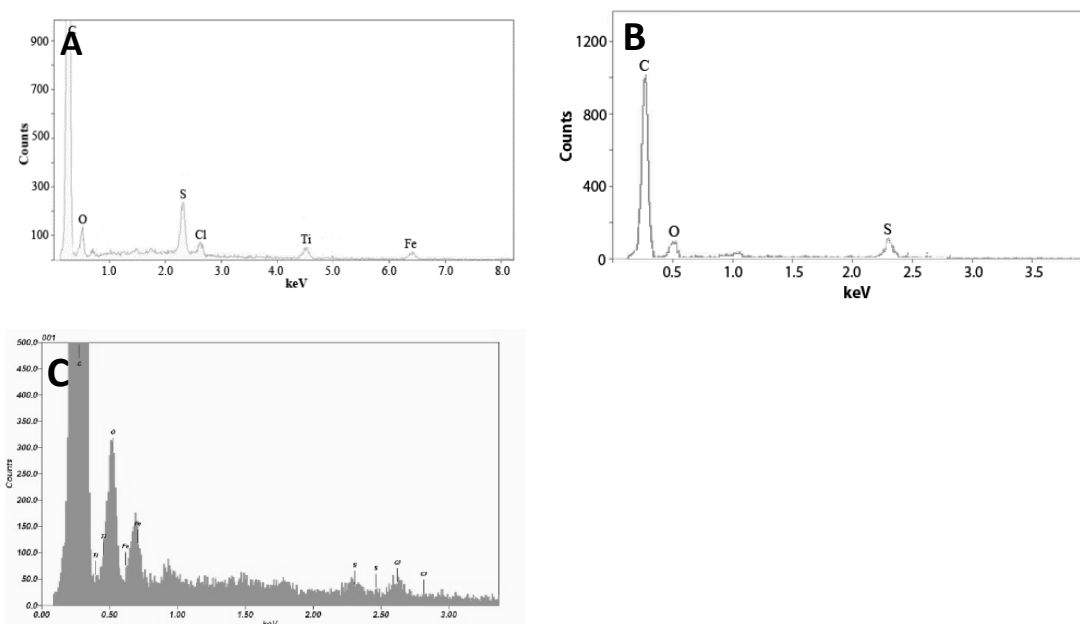

**Figure S2:** EDX spectra of: (a) a SWNT/PTS buckypaper, (b) a SWNT/TSP buckypaper, (c) a SWNT/C6S buckypaper.

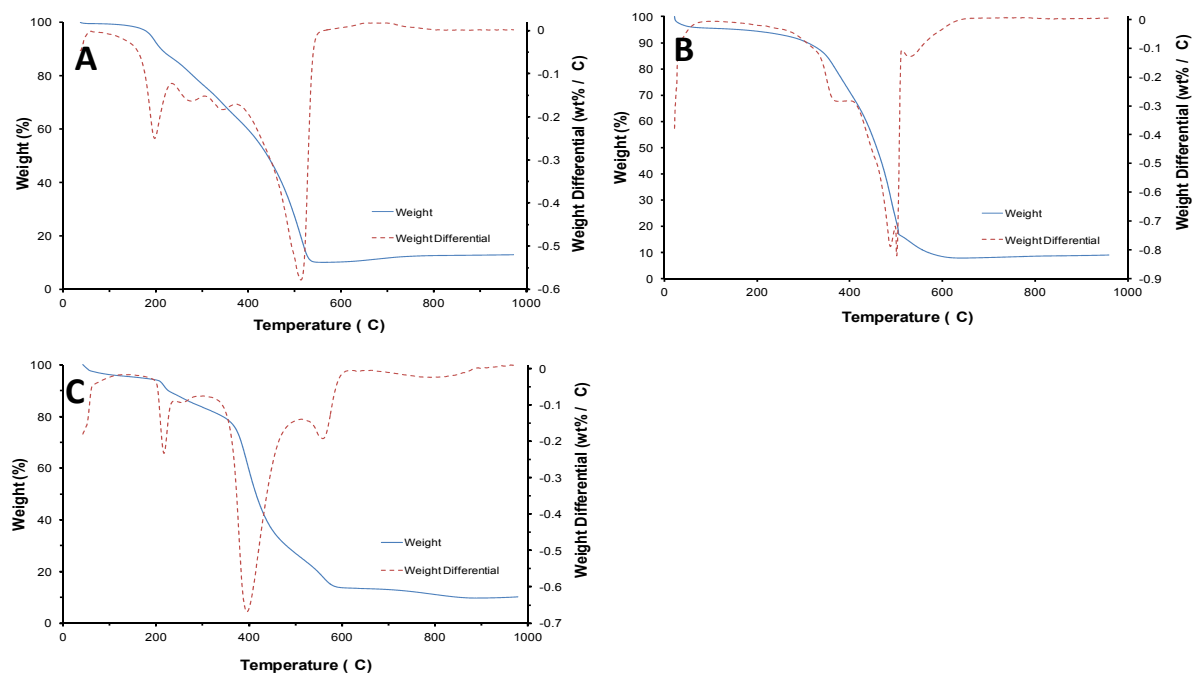

**Figure S4:** TGA data for (a) SWNT/Trix, (b) SWNT/C6S and (c) SWNT/ $\beta$ -CD buckypapers, showing the weight loss and weight loss differential curves with respect to temperature.

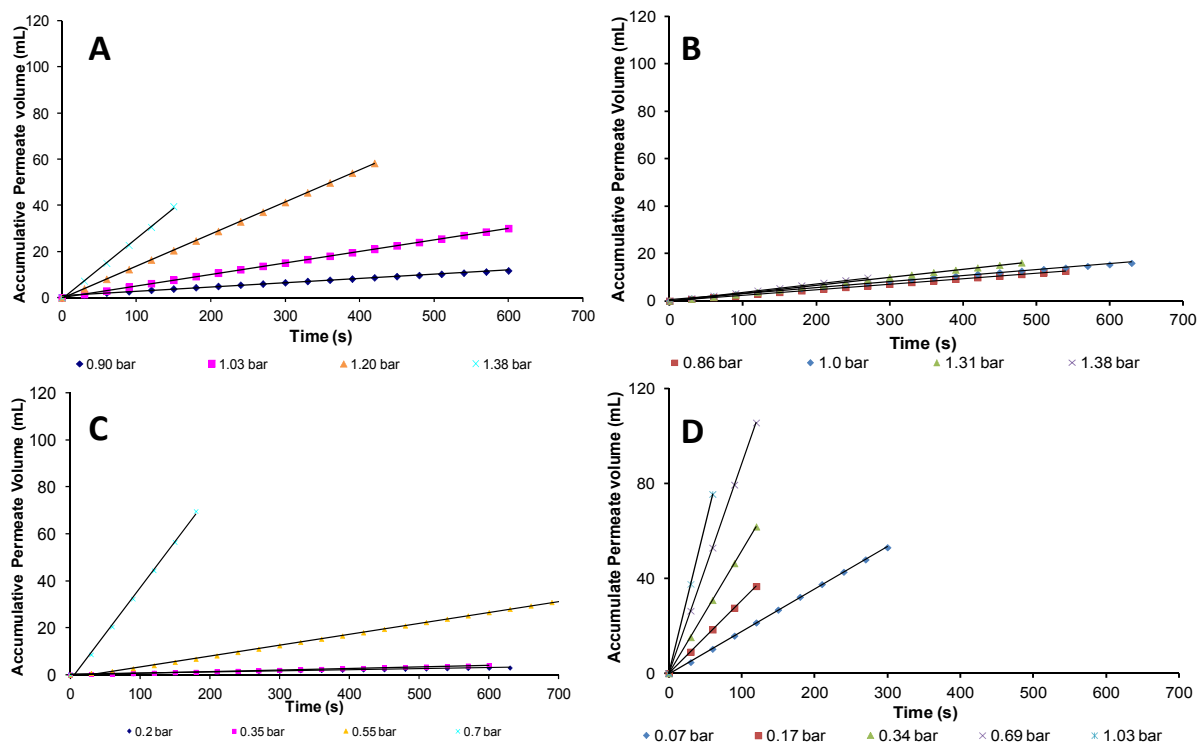

**Figure S4:** Water permeability plots for selected buckypaper and commercial membranes obtained using applied pressures between 0.07 and 1.52 bar: (a) SWNT/C6S, (b) SWNT/ $\beta$ -CD, (c) SWNT/TSP and (d) PVDF Durapore® membrane (0.22 $\mu$ m).

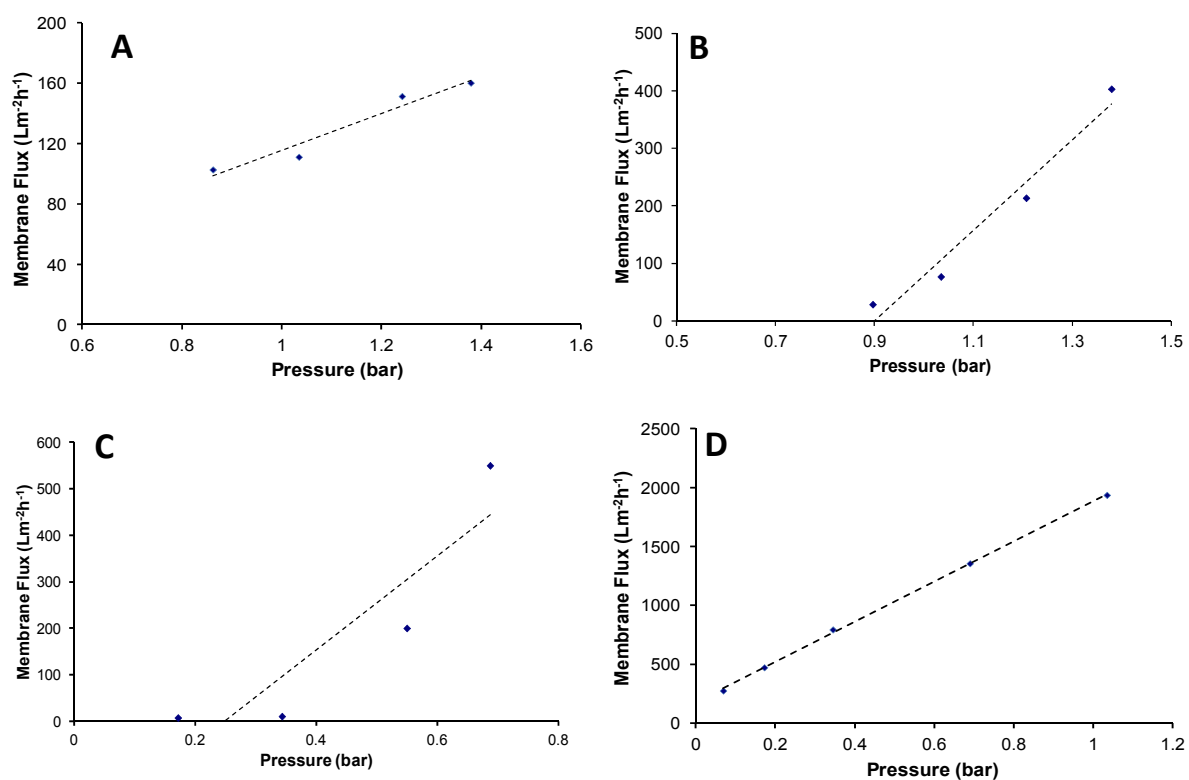

**Figure S5:** Effect of applied pressure on the permeate flux rate ( $J$ ) for SWNT buckypapers and a commercial membrane: (a) SWNT/ $\beta$ -CD, (b) SWNT/C6S, (c) SWNT/TSP and (d) PVDF Durapore® membrane (0.22 $\mu\text{m}$ ).
